# Supplementary material for: Antibacterial Application of Heterogeneous CuO-NiO-ZnO Metal Oxides Nanocomposites
Source: Research Square preprint supplement (doi:10.21203/rs.3.rs-7532947/v1), 2025-09-17
Supplement: Supplementary file 1 [file e34ea614fcbd63f5fe9fe3ae.docx]

#### Antibacterial Application of Heterogeneous CuO-NiO-ZnO Metal Oxides Nanocomposites

Vikas Choudhary1, Kusham Lata1, Manish Kumar1 2, Ajay Sharma 3 4, Raman Kumar5, Vivek Sheel Jaswal1*

1 Department of Chemistry and Chemical Sciences, School of Physical and Material Sciences,

Central University of Himachal Pradesh, Dharamshala, Shahpur Parisar, District Kangra,

Himachal Pradesh – 176206, India.

2 Department of Environmental Sciences, Central University of Himachal Pradesh, Kangra, Himachal Pradesh 176206, India.

3 Centre for Nano-Science and Technology, Career Point University, Tikker-Kharwarian, Hamirpur, Himachal Pradesh 176041, India.

4 Department of Chemistry, Career Point University, Tikker-Kharwarian, Hamirpur, Himachal Pradesh 176041, India.

5 Department of Biotechnology, MMEC, Maharishi Markandeshwar (Deemed to be University), Mullana, Ambala, 133207, Haryana, India.

*Corresponding Author 🖂chemsheel@gmail.com

**Graphical Abstract**

**
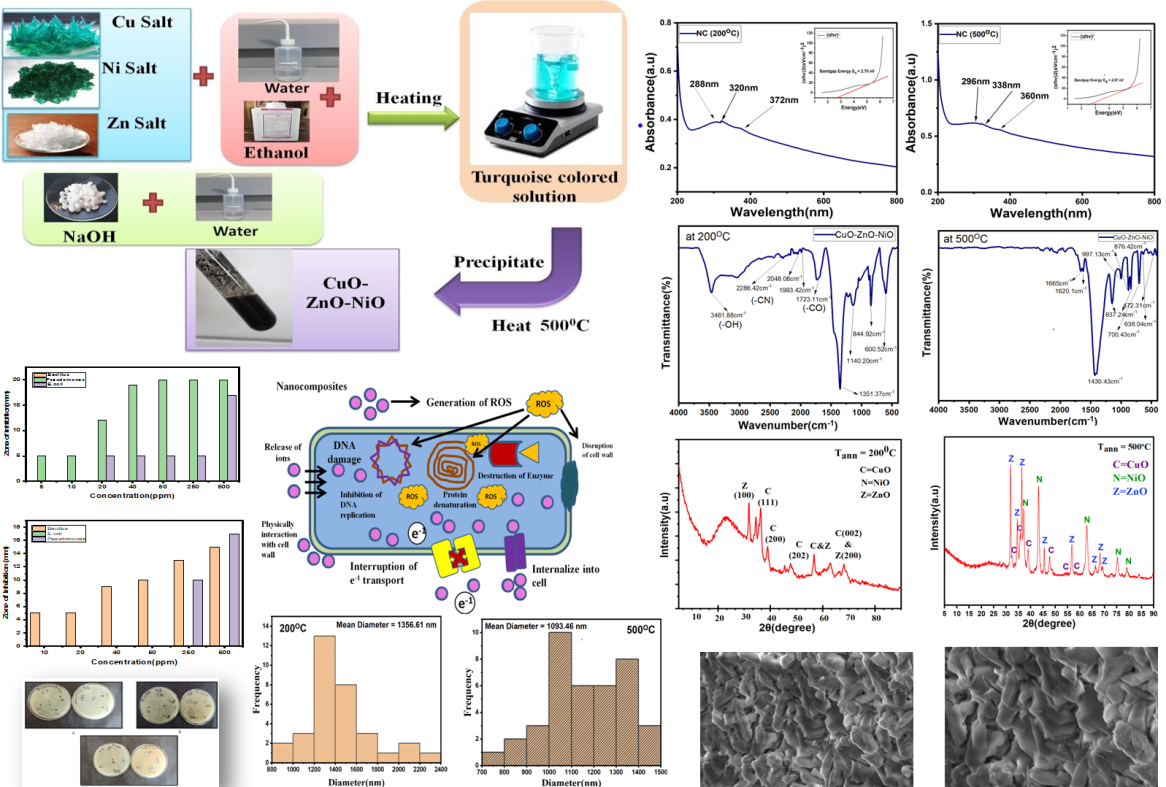
**
